# Supplementary material
Source: PubMed Central journal article supplement (PMC3434284)
Supplement: NIHMS373054-supplement-01.pdf [file NIHMS373054-supplement-01.pdf]

**Supplementary Material**

**eTable 1.** Participant Characteristics by Quartiles of Traditional Anion Gap in 11,957 participants of NHANES 1999-2004

**eTable 2.** Participant Characteristics by Quartiles of Albumin-Adjusted Anion Gap in 11,957 participants of NHANES 1999-2004

**eTable 3.** Relative Hazard of All-Cause Mortality with Revised Model 3

**eTable 4.** Relative Hazard of All-Cause Mortality by Serum Bicarbonate Quartiles in 11,957 participants of NHANES 1999-2004

**eTable 1. Participant Characteristics by Quartiles of Traditional Anion Gap in 11,957 participants of NHANES 1999-2004**

| Characteristic                            | Traditional Anion Gap (mEq/L) |             |             |            | P     |
|-------------------------------------------|-------------------------------|-------------|-------------|------------|-------|
|                                           | ≤ 10.0                        | 10.1 – 12.0 | 12.1 – 14.0 | ≥ 14.1     |       |
| <b>Number</b>                             | 3346                          | 3339        | 2864        | 2408       |       |
| <b>Age (years)</b>                        | 46.4 (0.3)                    | 46.3 (0.4)  | 46.3 (0.5)  | 45.5 (0.5) | 0.18  |
| <b>Women (%)</b>                          | 51.3 (1.0)                    | 51.6 (0.9)  | 50.1 (1.0)  | 49.7 (0.9) | 0.18  |
| <b>Race/Ethnicity (%)</b>                 |                               |             |             |            | 0.34  |
| <i>Non-Hispanic White</i>                 | 72.2 (2.1)                    | 72.7 (0.2)  | 72.4 (2.3)  | 72.1 (2.7) |       |
| <i>Mexican American</i>                   | 6.7 (1.0)                     | 7.8 (1.0)   | 7.4 (1.1)   | 7.0 (1.4)  |       |
| <i>Non-Hispanic Black</i>                 | 11.7 (1.3)                    | 10.7 (1.1)  | 9.1 (1.1)   | 8.5 (1.8)  |       |
| <b>Body-mass index (kg/m<sup>2</sup>)</b> |                               |             |             |            | 0.09  |
| < 20                                      | 4.3 (0.3)                     | 5.7 (0.6)   | 5.9 (0.6)   | 5.6 (0.7)  |       |
| 20 – 25                                   | 30.6 (1.0)                    | 29.2 (1.1)  | 29.7 (1.0)  | 26.4 (1.3) |       |
| 25 – 29                                   | 36.3 (0.9)                    | 34.4 (1.2)  | 32.7 (1.1)  | 36.0 (1.2) |       |
| 30 – 35                                   | 17.5 (0.7)                    | 19.0 (0.9)  | 19.1 (0.8)  | 18.7 (1.0) |       |
| > 35                                      | 11.3 (0.8)                    | 11.8 (0.9)  | 12.7 (1.0)  | 13.3 (0.9) |       |
| <b>Less than high-school diploma (%)</b>  | 17.6 (1.2)                    | 18.5 (0.9)  | 23.1 (1.0)  | 22.1 (1.2) | 0.002 |
| <b>Activity Level (MET-min/wk, %)</b>     |                               |             |             |            | 0.004 |
| 0                                         | 14.1 (0.8)                    | 15.7 (0.9)  | 18.8 (1.0)  | 18.6 (1.7) |       |
| < 500                                     | 21.6 (0.9)                    | 21.8 (0.9)  | 20.1 (1.0)  | 19.5 (0.8) |       |
| 500 – 2000                                | 36.2 (1.0)                    | 37.2 (0.7)  | 33.3 (1.1)  | 33.1 (1.4) |       |
| > 2000                                    | 28.1 (1.1)                    | 25.3 (1.2)  | 27.9 (1.3)  | 28.8 (1.7) |       |
| <b>Smoking (%)</b>                        |                               |             |             |            | 0.12  |
| <i>Never</i>                              | 52.2 (0.9)                    | 48.5 (0.9)  | 48.7 (1.6)  | 50.0 (2.5) |       |
| <i>Former</i>                             | 24.7 (1.0)                    | 27.0 (0.9)  | 25.2 (1.1)  | 23.5 (1.6) |       |
| <i>Current</i>                            | 23.0 (1.1)                    | 24.5 (1.0)  | 26.1 (1.4)  | 26.5 (1.3) |       |
| <b>Hypertension (%)</b>                   | 37.0 (1.2)                    | 40.1 (1.3)  | 40.8 (1.3)  | 43.9 (1.7) | 0.001 |
| <b>Diabetes mellitus (%)</b>              | 5.7 (0.5)                     | 7.6 (0.6)   | 7.5 (0.6)   | 8.1 (0.6)  | 0.006 |
| <b>Cardiovascular disease (%)</b>         | 7.3 (0.6)                     | 8.3 (0.7)   | 9.5 (0.7)   | 8.8 (0.7)  | 0.07  |
| <b>eGFR (mL/min/1.73m<sup>2</sup>)</b>    |                               |             |             |            | 0.55  |
| 15 – 59                                   | 5.6 (0.4)                     | 6.0 (0.5)   | 6.8 (0.4)   | 7.1 (0.5)  |       |
| 60 – 89                                   | 35.3 (1.2)                    | 35.5 (1.4)  | 35.7 (1.4)  | 34.1 (1.1) |       |
| 90 – 119                                  | 49.4 (1.3)                    | 48.2 (1.4)  | 48.1 (1.4)  | 49.2 (1.2) |       |

Abramowitz et al.

Page 3 of 8

Anion gap, GFR &amp; mortality

|                                  |              |              |              |              |        |
|----------------------------------|--------------|--------------|--------------|--------------|--------|
| $\geq 120$                       | 9.7 (0.7)    | 10.3 (0.7)   | 9.4 (0.7)    | 9.5 (0.8)    |        |
| <b>UACR &gt; 30 mg/g (%)</b>     | 7.2 (0.6)    | 9.4 (0.5)    | 10.0 (0.7)   | 11.1 (0.9)   | 0.001  |
| <b>Hemoglobin (g/dL)</b>         | 14.33 (0.05) | 14.47 (0.06) | 14.61 (0.05) | 14.79 (0.07) | <0.001 |
| <b>Serum bicarbonate (mEq/L)</b> | 25.4 (0.1)   | 24.4 (0.1)   | 23.6 (0.1)   | 22.6 (0.1)   | <0.001 |
| <b>Serum albumin (g/dL)</b>      | 4.24 (0.01)  | 4.33 (0.01)  | 4.39 (0.01)  | 4.47 (0.02)  | <0.001 |
| <b>Serum calcium (mg/dL)</b>     | 9.45 (0.02)  | 9.49 (0.02)  | 9.47 (0.02)  | 9.54 (0.03)  | 0.008  |
| <b>Serum phosphate (mg/dL)</b>   | 3.64 (0.02)  | 3.70 (0.02)  | 3.65 (0.02)  | 3.64 (0.02)  | 0.68   |

Abbreviations: MET, metabolic equivalent; eGFR, estimated glomerular filtration rate; UACR, urinary albumin-creatinine ratio.

Data are expressed as mean (SE) or percent (SE).

**eTable 2. Participant Characteristics by Quartiles of Albumin-Adjusted Anion Gap in 11,957 participants of NHANES 1999-2004**

| Characteristic                            | Albumin-Adjusted Anion Gap (mEq/L) |                      |                        |                    | P      |
|-------------------------------------------|------------------------------------|----------------------|------------------------|--------------------|--------|
|                                           | $\leq -0.50$<br>9.55               | $9.55-0.45$<br>11.05 | $11.05-10.06$<br>12.95 | $> 10.06$<br>12.95 |        |
| <b>Number</b>                             | 3124                               | 2716                 | 3042                   | 3075               |        |
| <b>Age (years)</b>                        | 45.1 (0.3)                         | 46.1 (0.4)           | 46.3 (0.4)             | 47.3 (0.6)         | 0.001  |
| <b>Women (%)</b>                          | 45.0 (1.0)                         | 52.1 (1.1)           | 51.7 (1.0)             | 55.0 (0.9)         | <0.001 |
| <b>Race/Ethnicity (%)</b>                 |                                    |                      |                        |                    | 0.52   |
| <i>Non-Hispanic White</i>                 | 73.6 (1.9)                         | 72.6 (2.0)           | 71.6 (2.3)             | 71.6 (2.6)         |        |
| <i>Mexican American</i>                   | 7.2 (0.9)                          | 7.7 (1.1)            | 7.5 (1.1)              | 6.7 (1.3)          |        |
| <i>Non-Hispanic Black</i>                 | 9.8 (1.1)                          | 11.1 (1.0)           | 10.6 (1.1)             | 9.4 (1.8)          |        |
| <b>Body-mass index (kg/m<sup>2</sup>)</b> |                                    |                      |                        |                    | <0.001 |
| < 20                                      | 5.4 (0.4)                          | 5.3 (0.6)            | 5.3 (0.6)              | 5.2 (0.6)          |        |
| 20 – 25                                   | 33.7 (1.1)                         | 30.0 (1.2)           | 28.4 (1.1)             | 24.2 (1.1)         |        |
| 25 – 29                                   | 36.8 (0.7)                         | 34.3 (1.2)           | 34.0 (1.3)             | 34.0 (1.1)         |        |
| 30 – 35                                   | 15.6 (0.6)                         | 19.9 (1.1)           | 19.3 (0.8)             | 19.7 (0.9)         |        |
| > 35                                      | 8.6 (0.7)                          | 10.4 (0.8)           | 13.0 (1.0)             | 17.0 (0.9)         |        |
| <b>Less than high-school diploma (%)</b>  | 16.9 (1.1)                         | 18.8 (1.0)           | 22.8 (1.0)             | 22.0 (1.2)         | <0.001 |
| <b>Activity Level (MET-min/wk, %)</b>     |                                    |                      |                        |                    | <0.001 |
| 0                                         | 12.8 (0.8)                         | 15.5 (0.8)           | 17.9 (1.1)             | 20.2 (1.6)         |        |
| < 500                                     | 20.9 (1.0)                         | 22.2 (1.0)           | 20.6 (1.1)             | 20.1 (0.9)         |        |
| 500 – 2000                                | 37.3 (1.0)                         | 36.8 (1.0)           | 33.9 (1.1)             | 32.4 (1.1)         |        |
| > 2000                                    | 29.0 (1.1)                         | 25.4 (1.3)           | 27.7 (1.1)             | 27.3 (1.5)         |        |
| <b>Smoking (%)</b>                        |                                    |                      |                        |                    | 0.16   |
| <i>Never</i>                              | 52.4 (0.9)                         | 49.9 (1.1)           | 47.3 (1.2)             | 49.8 (2.5)         |        |
| <i>Former</i>                             | 24.9 (1.1)                         | 25.4 (0.8)           | 25.6 (1.1)             | 25.1 (1.5)         |        |
| <i>Current</i>                            | 22.7 (1.2)                         | 24.7 (0.9)           | 27.1 (1.2)             | 25.1 (1.4)         |        |
| <b>Hypertension (%)</b>                   | 33.9 (1.2)                         | 38.5 (1.3)           | 42.2 (1.3)             | 46.5 (1.7)         | <0.001 |
| <b>Diabetes mellitus (%)</b>              | 4.6 (0.5)                          | 6.6 (0.6)            | 7.7 (0.7)              | 9.9 (0.7)          | <0.001 |
| <b>Cardiovascular disease (%)</b>         | 6.3 (0.6)                          | 7.8 (0.7)            | 9.6 (0.7)              | 10.2 (0.7)         | <0.001 |
| <b>eGFR (mL/min/1.73m<sup>2</sup>)</b>    |                                    |                      |                        |                    | <0.001 |
| 15 – 59                                   | 4.4 (0.4)                          | 5.8 (0.6)            | 6.8 (0.5)              | 8.4 (0.5)          |        |
| 60 – 89                                   | 35.4 (1.2)                         | 35.1 (1.5)           | 35.7 (1.2)             | 34.7 (1.1)         |        |
| 90 – 119                                  | 50.5 (1.2)                         | 49.0 (1.6)           | 48.0 (1.3)             | 47.3 (1.3)         |        |

Abramowitz et al.

Page 5 of 8

Anion gap, GFR &amp; mortality

|                                  |              |              |              |              |        |
|----------------------------------|--------------|--------------|--------------|--------------|--------|
| $\geq 120$                       | 9.8 (0.7)    | 10.1 (0.7)   | 9.6 (0.6)    | 9.6 (0.8)    |        |
| <b>UACR &gt; 30 mg/g (%)</b>     | 6.7 (0.5)    | 8.0 (0.6)    | 10.2 (0.6)   | 12.3 (0.8)   | <0.001 |
| <b>Hemoglobin (g/dL)</b>         | 14.53 (0.05) | 14.44 (0.05) | 14.55 (0.05) | 14.59 (0.07) | 0.28   |
| <b>Serum bicarbonate (mEq/L)</b> | 25.5 (0.1)   | 24.6 (0.1)   | 23.8 (0.1)   | 22.6 (0.1)   | <0.001 |
| <b>Serum albumin (g/dL)</b>      | 4.38 (0.01)  | 4.33 (0.01)  | 4.35 (0.01)  | 4.33 (0.01)  | 0.05   |
| <b>Serum calcium (mg/dL)</b>     | 9.50 (0.02)  | 9.49 (0.01)  | 9.48 (0.02)  | 9.47 (0.02)  | 0.13   |
| <b>Serum phosphate (mg/dL)</b>   | 3.64 (0.02)  | 3.68 (0.02)  | 3.65 (0.02)  | 3.66 (0.02)  | 0.57   |

Abbreviations: MET, metabolic equivalent; eGFR, estimated glomerular filtration rate; UACR, urinary albumin-creatinine ratio.

Data are expressed as mean (SE) or percent (SE).

**eTable 3. Relative Hazard of All-Cause Mortality with Revised Model 3**

| Anion Gap               | Relative Hazard (95% CI) |                         |                         |                         |
|-------------------------|--------------------------|-------------------------|-------------------------|-------------------------|
|                         | Model 1                  | Model 2                 | Model 3                 | Model 4                 |
| <b>Traditional</b>      |                          |                         |                         |                         |
| Continuous*             | <b>1.15 (1.02-1.29)</b>  | <b>1.15 (1.03-1.29)</b> | 1.09 (0.97-1.23)        | 1.08 (0.94-1.24)        |
| Quartile 1              | Ref                      | Ref                     | Ref                     | Ref                     |
| Quartile 2              | 0.86 (0.66-1.12)         | 0.86 (0.67-1.10)        | 0.81 (0.62-1.05)        | 0.83 (0.64-1.07)        |
| Quartile 3              | 1.01 (0.76-1.35)         | 0.99 (0.75-1.32)        | 0.90 (0.67-1.21)        | 0.90 (0.66-1.23)        |
| Quartile 4              | 1.30 (0.96-1.74)         | <b>1.32 (1.01-1.72)</b> | 1.16 (0.89-1.51)        | 1.20 (0.89-1.61)        |
| P for trend             | 0.04                     | 0.02                    | 0.15                    | 0.15                    |
| <b>Albumin adjusted</b> |                          |                         |                         |                         |
| Continuous*             | <b>1.40 (1.25-1.58)</b>  | <b>1.28 (1.14-1.44)</b> | <b>1.21 (1.07-1.36)</b> | <b>1.19 (1.03-1.38)</b> |
| Quartile 1              | Ref                      | Ref                     | Ref                     | Ref                     |
| Quartile 2              | <b>1.36 (1.05-1.76)</b>  | 1.29 (0.99-1.67)        | 1.23 (0.95-1.59)        | 1.24 (0.97-1.59)        |
| Quartile 3              | 1.30 (1.00-1.70)         | 1.19 (0.91-1.56)        | 1.09 (0.84-1.42)        | 1.07 (0.82-1.38)        |
| Quartile 4              | <b>2.17 (1.62-2.91)</b>  | <b>1.82 (1.37-2.41)</b> | <b>1.58 (1.18-2.12)</b> | <b>1.62 (1.19-2.21)</b> |
| P for trend             | <0.001                   | <0.001                  | 0.004                   | 0.007                   |
| <b>Full</b>             |                          |                         |                         |                         |
| Continuous*             | <b>1.50 (1.33-1.68)</b>  | <b>1.29 (1.15-1.45)</b> | <b>1.21 (1.07-1.37)</b> | <b>1.20 (1.03-1.41)</b> |
| Quartile 1              | Ref                      | Ref                     | Ref                     | Ref                     |
| Quartile 2              | <b>1.67 (1.22-2.29)</b>  | <b>1.40 (1.01-1.94)</b> | 1.31 (0.92-1.85)        | 1.31 (0.97-1.79)        |
| Quartile 3              | <b>1.59 (1.19-2.13)</b>  | 1.28 (0.95-1.72)        | 1.18 (0.87-1.60)        | 1.19 (0.90-1.57)        |
| Quartile 4              | <b>2.68 (1.87-3.83)</b>  | <b>1.88 (1.31-2.70)</b> | <b>1.62 (1.12-2.35)</b> | <b>1.64 (1.17-2.31)</b> |
| P for trend             | <0.001                   | 0.001                   | 0.01                    | 0.01                    |

Abbreviations: CI, Confidence Interval. **Bold** values indicate  $p < 0.05$ .

Quartile cutoff levels for each anion gap definition: Traditional: Q1  $\leq 10$ ; Q2 10.1-12; Q3 12.1-14; Q4  $\geq 14.1$  mEq/L; Albumin adjusted: **Q1  $\leq -0.50$ ; Q2 -0.45-1.05; Q3 1.10-2.95; Q4  $\geq 3$  mEq/L; Full: Q1  $\leq 3.61$ ; Q2 3.62-5.34; Q3 5.35-7.23; Q4  $> 7.23$  mEq/L; Q1  $\leq 9.5$ ; Q2 9.55-11.05; Q3 11.10-12.95; Q4  $\geq 13$  mEq/L; Full: Q1  $\leq 13.61$ ; Q2 13.62-15.34; Q3 15.35-17.23; Q4  $> 17.23$  mEq/L.**

\* Per standard deviation higher anion gap (traditional SD = 2.55 mEq/L; Albumin adjusted SD = 2.47 mEq/L; Full SD = 2.49 mEq/L).

Model 1: unadjusted

Model 2: adjusted for age, sex, race/ethnicity

**Model 3: adjusted for age, sex, race/ethnicity, eGFR categories, and log-transformed urine albumin-creatinine ratio**

Model 4: adjusted for age, sex, race/ethnicity, eGFR categories, BMI, education, activity level, smoking status, diagnosis of diabetes mellitus, hypertension, cardiovascular disease, log-transformed urine albumin-creatinine ratio, serum bicarbonate, and hemoglobin

**eTable 4. Relative Hazard of All-Cause Mortality by Serum Bicarbonate Quartiles in 11,957 participants of NHANES 1999-2004**

| Serum Bicarbonate    | Relative Hazard (95% CI) |                  |                  |                  |
|----------------------|--------------------------|------------------|------------------|------------------|
|                      | Model 1                  | Model 2          | Model 3          | Model 4          |
| Continuous*          | <b>1.19 (1.04-1.36)</b>  | 0.94 (0.84-1.06) | 0.96 (0.86-1.07) | 1.01 (0.89-1.13) |
| ≤ 23 mEq/L (n=4468)  | Ref                      | Ref              | Ref              | Ref              |
| 24 mEq/L (n=2116)    | 1.00 (0.72-1.39)         | 0.85 (0.63-1.15) | 0.87 (0.65-1.18) | 0.89 (0.68-1.16) |
| 25-26 mEq/L (n=3536) | 1.22 (0.93-1.59)         | 0.86 (0.66-1.13) | 0.88 (0.69-1.13) | 0.98 (0.77-1.25) |
| ≥ 27 mEq/L (n=1837)  | <b>1.72 (1.25-2.36)</b>  | 0.94 (0.71-1.24) | 0.97 (0.73-1.27) | 1.12 (0.82-1.53) |
| P for trend          | 0.005                    | 0.53             | 0.64             | 0.58             |

Abbreviations: CI, Confidence Interval. **Bold** values indicate  $p < 0.05$ .

\* Per standard deviation higher serum bicarbonate (SD = 2.28 mEq/L).

Model 1: unadjusted

Model 2: adjusted for age, sex, race/ethnicity

Model 3: adjusted for age, sex, race/ethnicity, and eGFR categories

Model 4: adjusted for age, sex, race/ethnicity, eGFR categories, BMI, education, activity level, smoking status, diagnosis of diabetes mellitus, hypertension, cardiovascular disease, log-transformed urine albumin-creatinine ratio, and hemoglobin
